# Supplementary material for: Biological Evaluation and Conformational Preferences of Ferrocene Dipeptides with Hydrophobic Amino Acids
Source: MDPI journal article supplement (doi:10.3390/inorganics11010029), 2023-01-03
Supplement: s1 [file s1]

# Biological Evaluation and Conformational Preferences of Ferrocene Dipeptides with Hydrophobic Amino Acids

**Monika Kovačević<sup>1</sup>, Mojca Čakić Semenčić<sup>1</sup>, Ivan Kodrin<sup>2</sup>, Sunčica Roca<sup>3</sup>, Jana Perica<sup>1</sup>, Jasna Mrvčić<sup>4</sup>, Damir Stanzer<sup>4</sup>, Krešimir Molčanov<sup>5</sup>, Valentina Milašinović<sup>5</sup>, Lidija Brkljačić<sup>6</sup> and Lidija Barišić<sup>1,\*</sup>**

<sup>1</sup> Department of Chemistry and Biochemistry, Faculty of Food Technology and Biotechnology, University of Zagreb, Pierottijeva 6, Zagreb, Croatia

<sup>2</sup> Department of Chemistry Faculty of Science, University of Zagreb Horvatovac 102a, Zagreb, Croatia

<sup>3</sup> NMR Centre, Ruđer Bošković Institute, Bijenička cesta 54, Zagreb, Croatia

<sup>4</sup> Department of Food Engineering, Faculty of Food Technology and Biotechnology, University of Zagreb, Pierottijeva 6, Zagreb, Croatia

<sup>5</sup> Division of Physical Chemistry, Ruđer Bošković Institute, Bijenička cesta 54, Zagreb, Croatia

<sup>6</sup> Division of Organic Chemistry and Biochemistry, Ruđer Bošković Institute, Bijenička cesta 54, Zagreb, Croatia

Correspondence: [mojca.cakic@pbf.unizg.hr](mailto:mojca.cakic@pbf.unizg.hr) (M.Č.S.); [ikodrin@chem.pmf.hr](mailto:ikodrin@chem.pmf.hr) (I.K);

Tel: +385-1-4605-067 (M.Č.S.); +385-1-4606-403 (I.K)

**Table S1.** Melting points of L-/D-**1a-3a** and L-/D-**1b-3b**

|              | Peptide               | Melting point (°C) |
|--------------|-----------------------|--------------------|
| L- <b>1b</b> | Boc-L-Val-NH-Fn-COOMe | 112.3              |
| L- <b>2b</b> | Boc-L-Leu-NH-Fn-COOMe | 123                |
| L- <b>3b</b> | Boc-L-Phe-NH-Fn-COOMe | 130.6              |
| D- <b>1b</b> | Boc-D-Val-NH-Fn-COOMe | 112.5              |
| D- <b>2b</b> | Boc-D-Leu-NH-Fn-COOMe | 123.1              |
| D- <b>3b</b> | Boc-D-Phe-NH-Fn-COOMe | 130.7              |
| L- <b>1a</b> | Ac-L-Val-NH-Fn-COOMe  | 156                |
| L- <b>2a</b> | Ac-L-Leu-NH-Fn-COOMe  | 145.2              |
| L- <b>3a</b> | Ac-L-Phe-NH-Fn-COOMe  | 198.6              |
| D- <b>1a</b> | Ac-D-Val-NH-Fn-COOMe  | 156.1              |
| D- <b>2a</b> | Ac-D-Leu-NH-Fn-COOMe  | 145.3              |
| D- <b>3a</b> | Ac-D-Phe-NH-Fn-COOMe  | 198.7              |

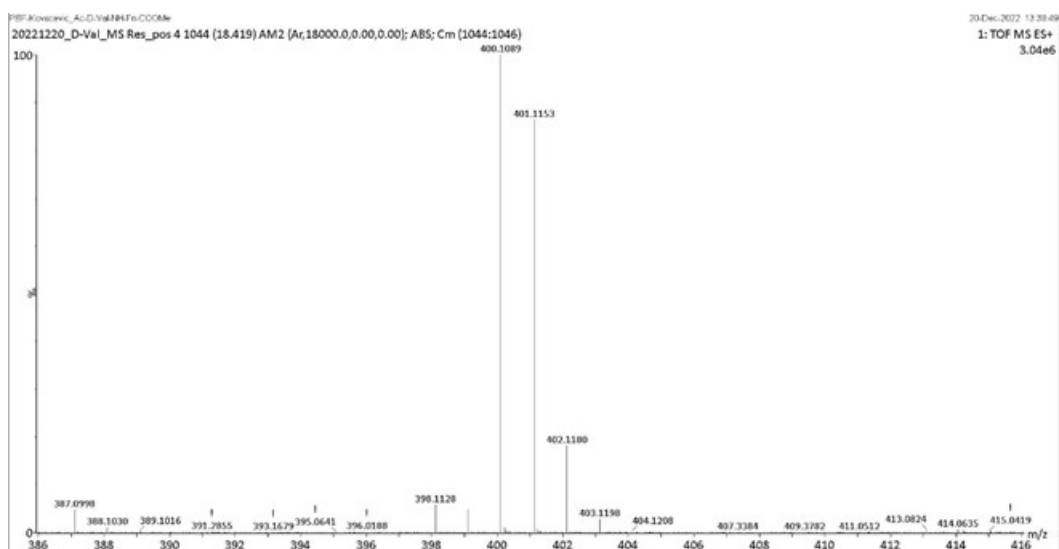

| Peptide | Molecular formula    | Ion     | Calculated mass | Measured mass |
|---------|----------------------|---------|-----------------|---------------|
| D-1a    | Ac-D-Val-NH-Fn-COOMe | $[M]^+$ | 400.1085        | 400.1089      |

Figure S1. HRMS spectrum of compound D-1a

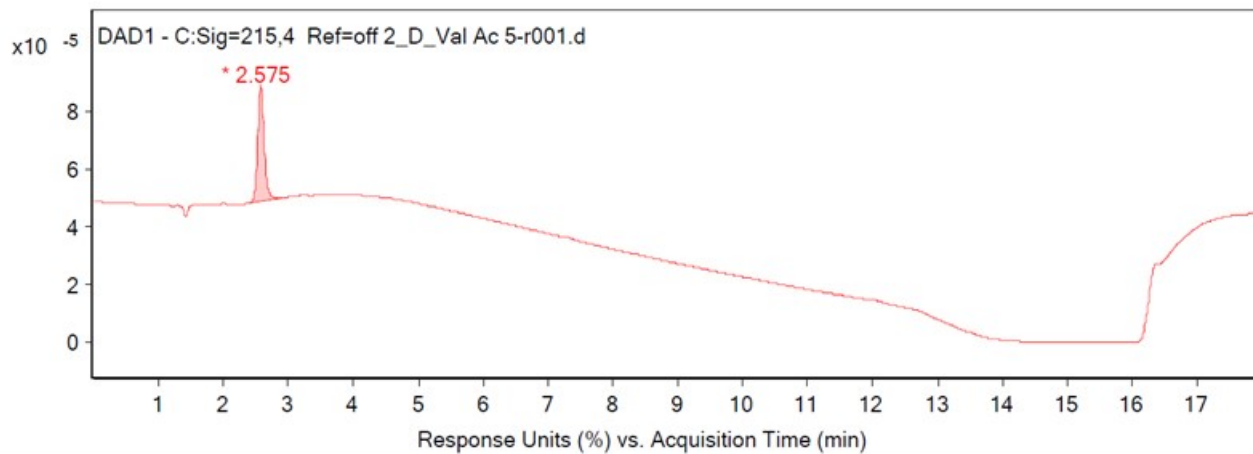

Integration Peak List

| Peak | Start | RT    | End   | Height | Area   | Area % |
|------|-------|-------|-------|--------|--------|--------|
| 1    | 2.382 | 2.575 | 2.922 | 108.73 | 769.81 | 100    |

Figure S2. HPLC spectrum of compound D-1a

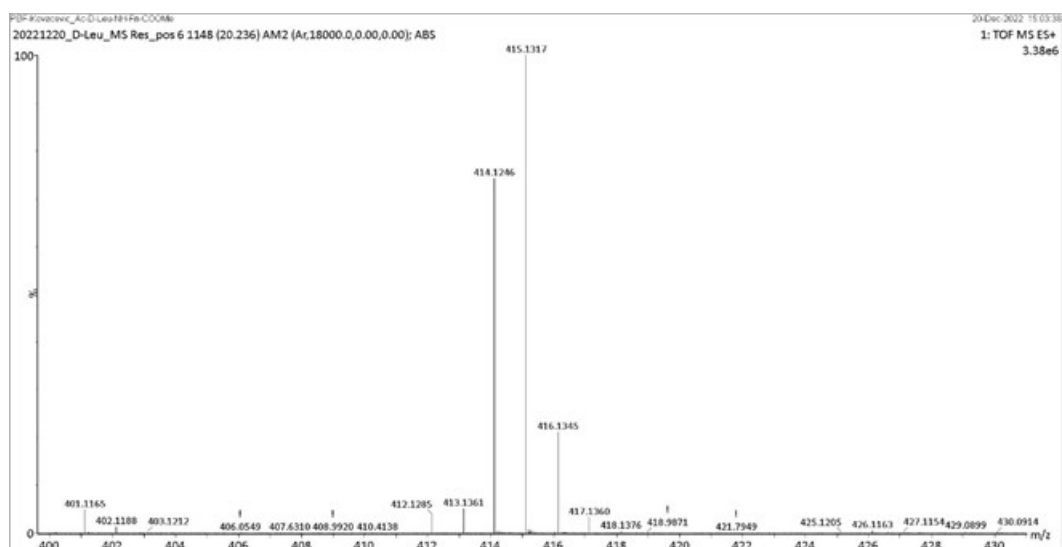

| Peptide | Molecular formula    | Ion       | Calculated mass | Measured mass |
|---------|----------------------|-----------|-----------------|---------------|
| D-2a    | Ac-D-Leu-NH-Fn-COOMe | $[M+H]^+$ | 415.1320        | 415.1317      |

Figure S3. HRMS spectrum of compound D-2a

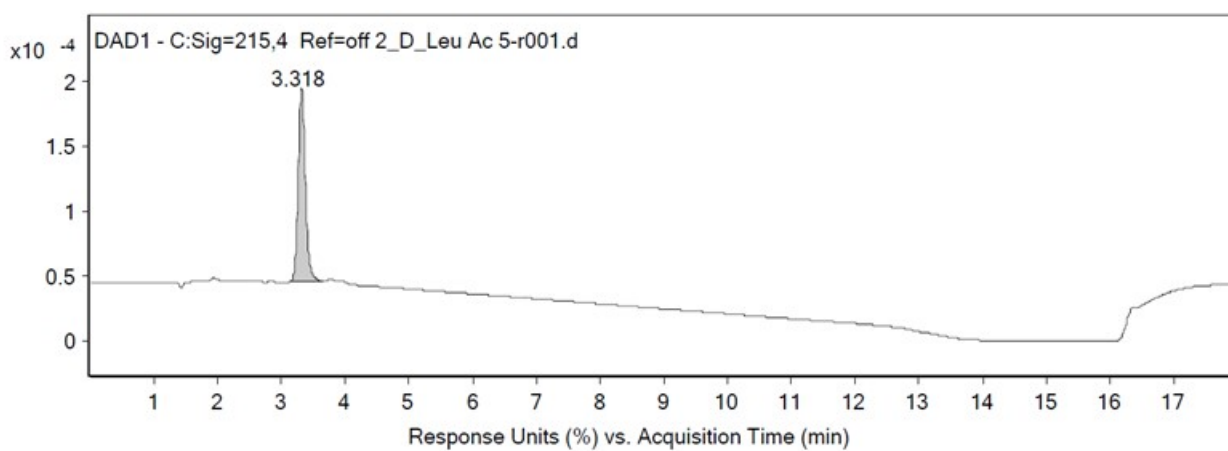

Integration Peak List

| Peak | Start | RT    | End   | Height | Area    | Area % |
|------|-------|-------|-------|--------|---------|--------|
| 1    | 3.146 | 3.318 | 3.647 | 399.87 | 3184.69 | 100    |

Figure S4. HPLC spectrum of compound D-2a

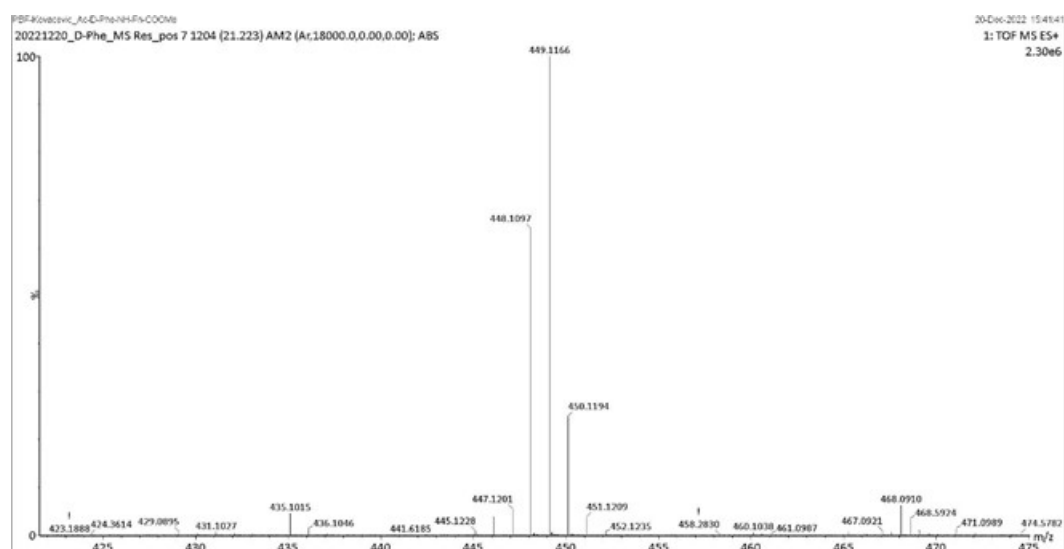

| Peptide | Molecular formula    | Ion       | Calculated mass | Measured mass |
|---------|----------------------|-----------|-----------------|---------------|
| D-3a    | Ac-D-Phe-NH-Fn-COOMe | $[M+H]^+$ | 449.1164        | 449.1166      |

Figure S5. HRMS spectrum of compound D-3a

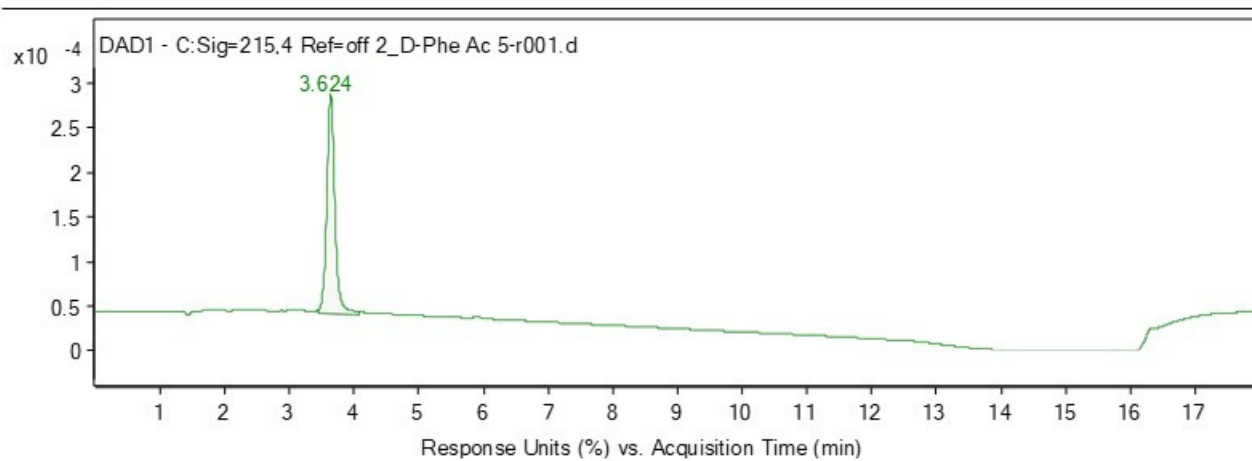

Integration Peak List

| Peak | Start | RT    | End  | Height | Area    | Area % |
|------|-------|-------|------|--------|---------|--------|
| 1    | 3.43  | 3.624 | 4.07 | 663.75 | 5882.13 | 100    |

Figure S6. HPLC spectrum of compound D-3a

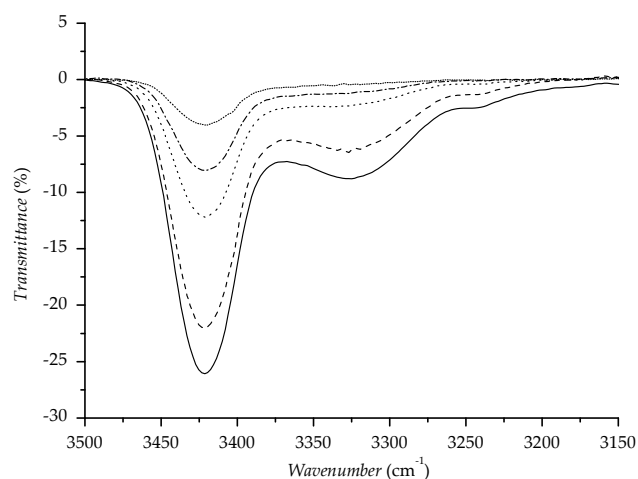

**Figure S7.** The NH stretching vibrations in concentration-dependent IR spectra of D-**1b** in DCM [(—)  $c = 5 \times 10^{-2}$  M, (— — —)  $c = 2.5 \times 10^{-2}$  M, ( $\cdot \cdot \cdot$ )  $c = 1.25 \times 10^{-2}$  M, (- - - - -)  $c = 0.6 \times 10^{-2}$  M, ( $\cdot \cdot \cdot \cdot \cdot$ )  $c = 0.3 \times 10^{-2}$  M].

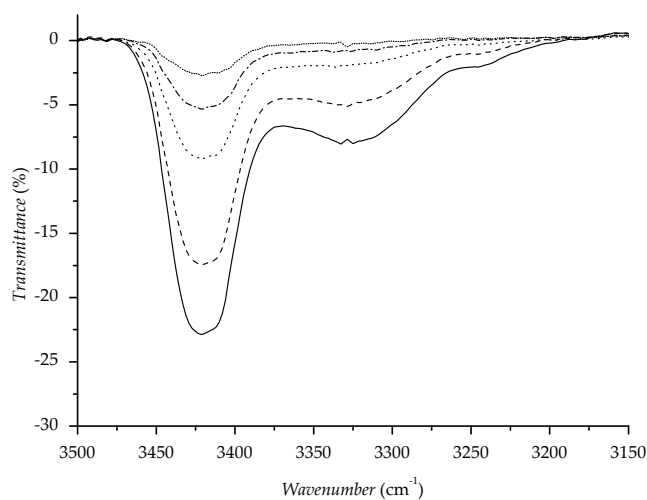

**Figure S8.** The NH stretching vibrations in concentration-dependent IR spectra of D-**2b** in DCM [(—)  $c = 5 \times 10^{-2}$  M, (— — —)  $c = 2.5 \times 10^{-2}$  M, ( $\cdot \cdot \cdot$ )  $c = 1.25 \times 10^{-2}$  M, (- - - - -)  $c = 0.6 \times 10^{-2}$  M, ( $\cdot \cdot \cdot \cdot \cdot$ )  $c = 0.3 \times 10^{-2}$  M].

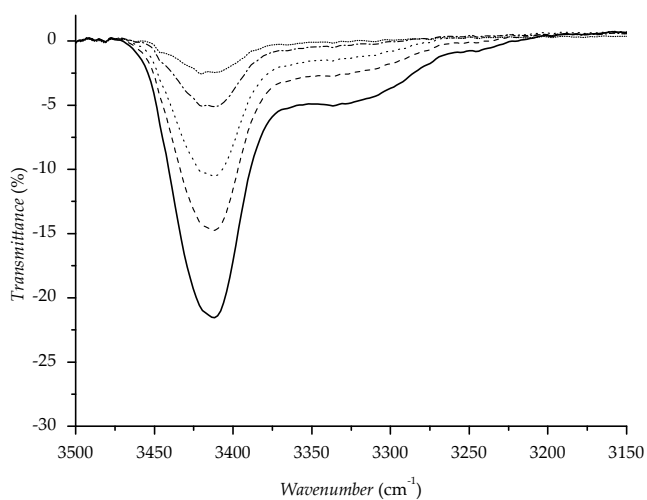

**Figure S9.** The NH stretching vibrations in concentration-dependent IR spectra of D-**3b** in DCM [(—)  $c = 5 \times 10^{-2}$  M, (— — —)  $c = 2.5 \times 10^{-2}$  M, ( $\cdot \cdot \cdot$ )  $c = 1.25 \times 10^{-2}$  M, (- - - - -)  $c = 0.6 \times 10^{-2}$  M, ( $\cdot \cdot \cdot \cdot \cdot$ )  $c = 0.3 \times 10^{-2}$  M].

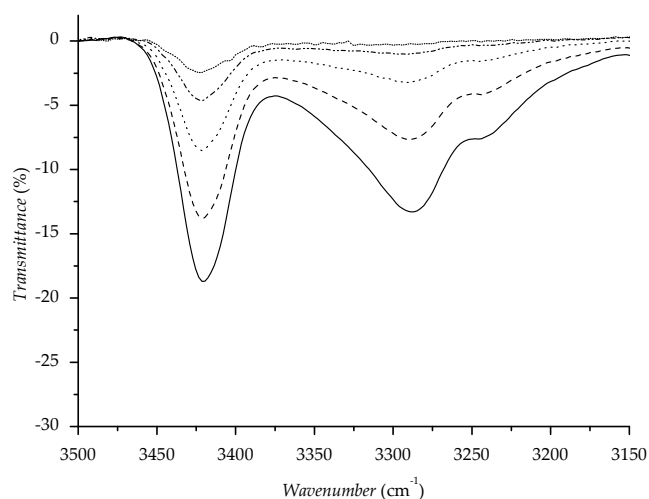

**Figure S10.** The NH stretching vibrations in concentration-dependent IR spectra of D-1a in DCM [(—)  $c = 5 \times 10^{-2}$  M, (---)  $c = 2.5 \times 10^{-2}$  M, ( $\cdots$ )  $c = 1.25 \times 10^{-2}$  M, (- - - -)  $c = 0.6 \times 10^{-2}$  M, (· · · ·)  $c = 0.3 \times 10^{-2}$  M].

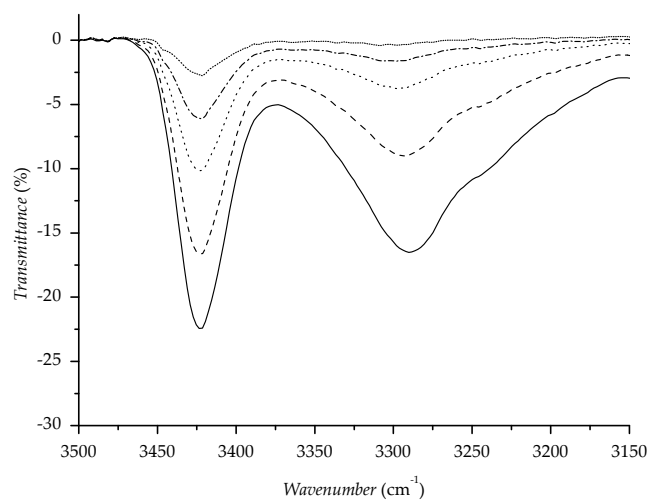

**Figure S11.** The NH stretching vibrations in concentration-dependent IR spectra of D-2a in DCM [(—)  $c = 5 \times 10^{-2}$  M, (---)  $c = 2.5 \times 10^{-2}$  M, ( $\cdots$ )  $c = 1.25 \times 10^{-2}$  M, (- - - -)  $c = 0.6 \times 10^{-2}$  M, (· · · ·)  $c = 0.3 \times 10^{-2}$  M].

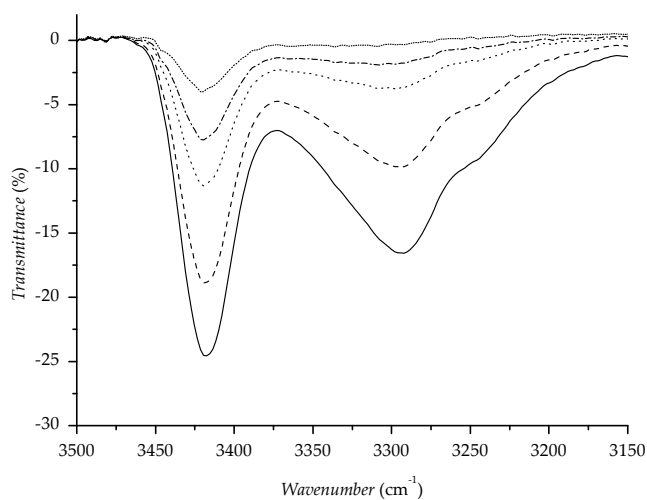

**Figure S12.** The NH stretching vibrations in concentration-dependent IR spectra of D-3a in DCM [(—)  $c = 5 \times 10^{-2}$  M, (---)  $c = 2.5 \times 10^{-2}$  M, ( $\cdots$ )  $c = 1.25 \times 10^{-2}$  M, (- - - -)  $c = 0.6 \times 10^{-2}$  M, (· · · ·)  $c = 0.3 \times 10^{-2}$  M].

**Table S2.** Concentration dependence of NH chemical shifts of derivatives D-1a, D-2a and D-3a

| <i>c</i> (mM)  | $\delta$ (ppm)    |                   |                   |                   |                   |                   |
|----------------|-------------------|-------------------|-------------------|-------------------|-------------------|-------------------|
|                | NH <sub>Fca</sub> | NH <sub>Val</sub> | NH <sub>Fca</sub> | NH <sub>Leu</sub> | NH <sub>Fca</sub> | NH <sub>Phe</sub> |
| 50             | 8.19              | 6.46              | 8.15              | 6.38              | 7.73              | 6.44              |
| 25             | 7.93              | 6.33              | 7.89              | 6.17              | 7.56              | 6.35              |
| 12.5           | 7.69              | 6.23              | 7.73              | 6.05              | 7.37              | 6.24              |
| 6.25           | 7.56              | 6.19              | 7.63              | 5.98              | 7.3               | 6.18              |
| $\Delta\delta$ | 0.63              | 0.27              | 0.52              | 0.4               | 0.43              | 0.26              |

**Table S3.** Temperature dependence of chemical shifts of ferrocene peptides D-1a, D-2a and D-3a [NMR-spectra are recorded in CDCl<sub>3</sub> (*c* = 2.5·10<sup>-2</sup> M)]

| <i>T</i> (K)   | $\delta$ (ppm)    |                   |                   |                   |                   |                   |
|----------------|-------------------|-------------------|-------------------|-------------------|-------------------|-------------------|
|                | NH <sub>Fca</sub> | NH <sub>Val</sub> | NH <sub>Fca</sub> | NH <sub>Leu</sub> | NH <sub>Fca</sub> | NH <sub>Phe</sub> |
| 258            | 8.8               | 6.74              | 8.68              | 6.76              | 8.3               | 6.81              |
| 268            | 8.59              | 6.63              | 8.39              | 6.53              | 8.04              | 6.65              |
| 278            | 8.43              | 6.55              | 8.16              | 6.36              | 7.84              | 6.53              |
| 288            | 8.24              | 6.46              | 8.00              | 6.24              | 7.69              | 6.42              |
| 298            | 8.06              | 6.38              | 7.86              | 6.15              | 7.55              | 6.35              |
| 308            | 7.9               | 6.31              | 7.75              | 6.08              | 7.46              | 6.3               |
| 318            | 7.75              | 6.25              | 7.68              | 6.03              | 7.37              | 6.23              |
| 328            | 7.62              | 6.19              | 7.6               | 5.97              | 7.31              | 6.17              |
| $\Delta\delta$ | 1.18              | 0.55              | 1.08              | 0.79              | 0.99              | 0.64              |



**Table S4.** DMSO titration of ferrocene peptides D-1a, D-2a and D-3a

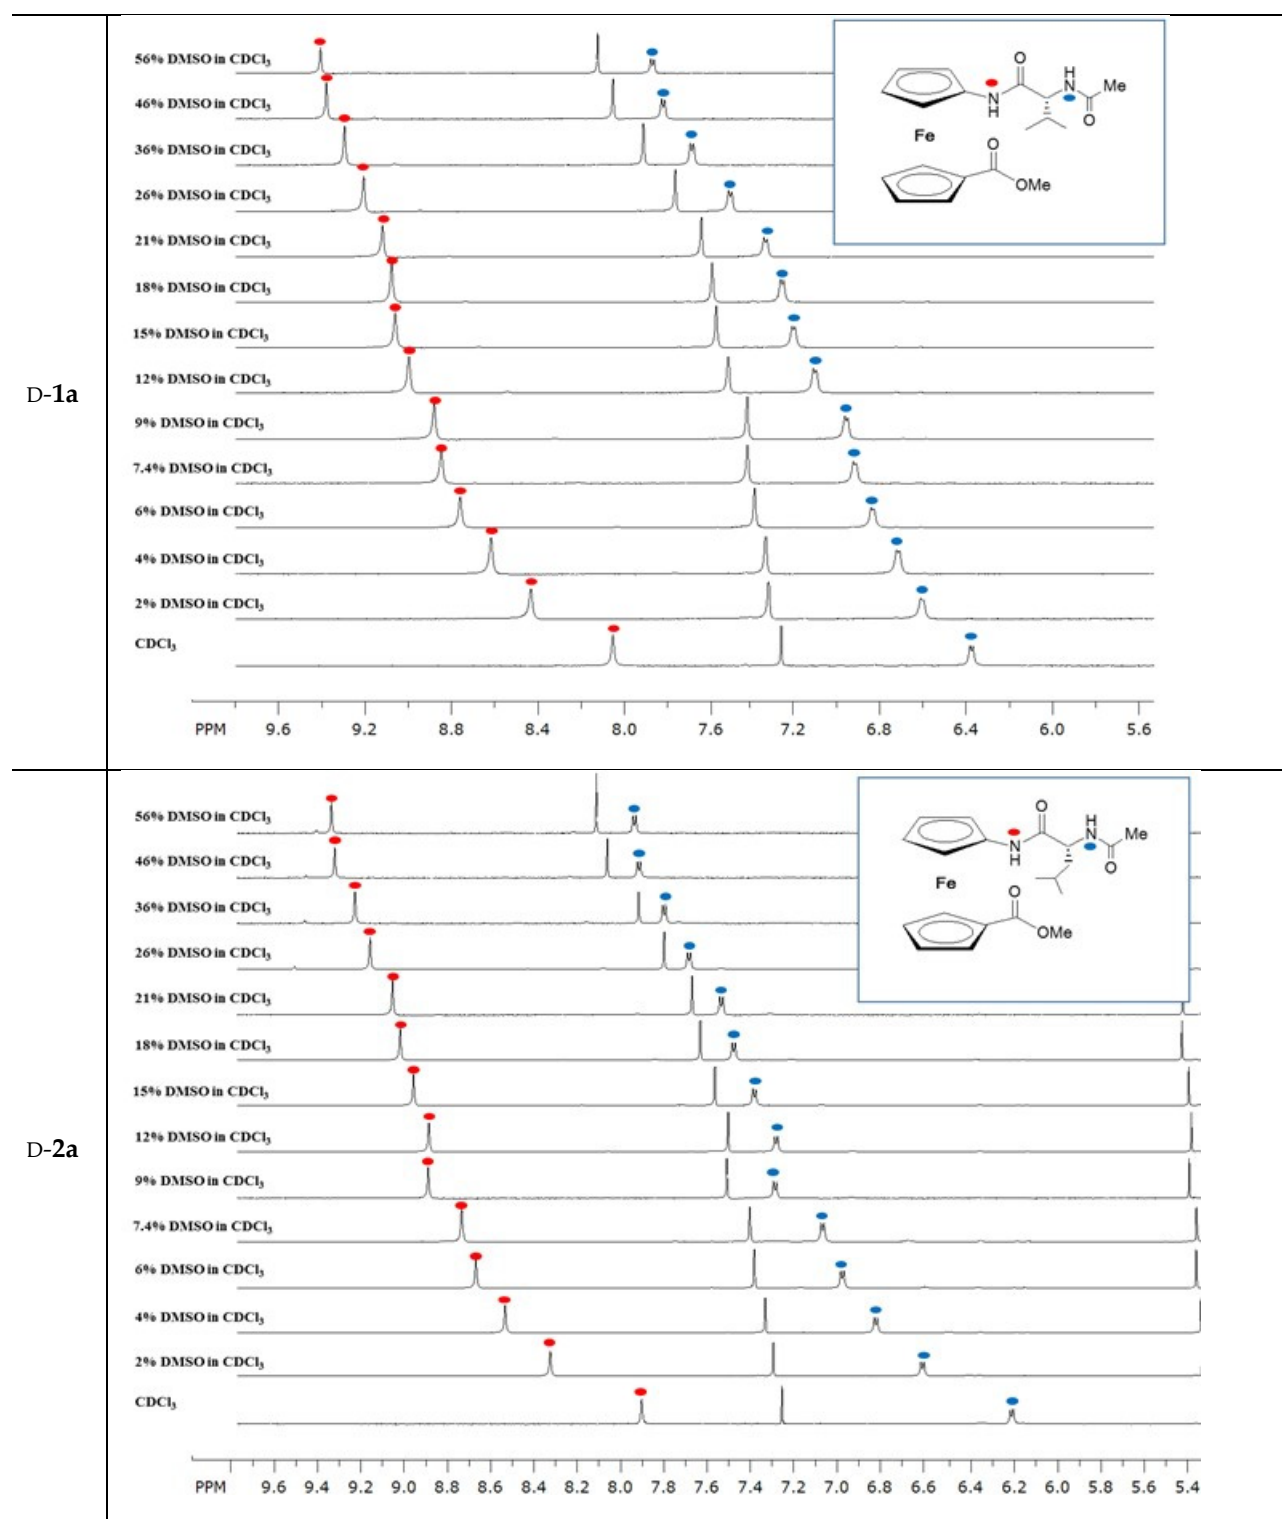

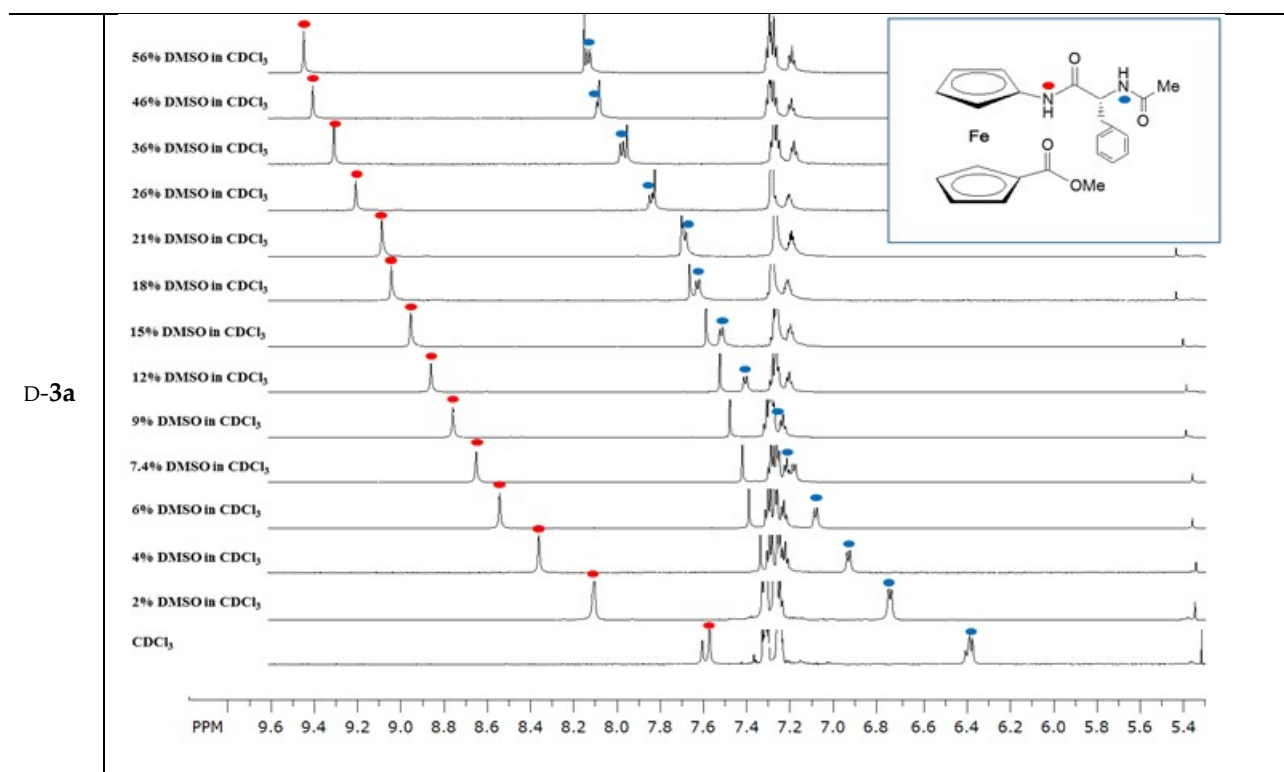

**Table S5.** UV/Vis-signals and Cottons effects in peptides L-/D-**1a-3a** and L-/D-**1b-3b**

|              | Peptide               |  | $\lambda_{\text{max}} / \text{nm}$ | $[\theta] / \text{deg cm}^2 \text{dmol}^{-1}$ |
|--------------|-----------------------|--|------------------------------------|-----------------------------------------------|
| L- <b>1b</b> | Boc-L-Val-NH-Fn-COOMe |  | 480                                | 1227,62624                                    |
| L- <b>2b</b> | Boc-L-Leu-NH-Fn-COOMe |  | 479,2                              | 959,55305                                     |
| L- <b>3b</b> | Boc-L-Phe-NH-Fn-COOMe |  | 480                                | 678,77391                                     |
| D- <b>1b</b> | Boc-D-Val-NH-Fn-COOMe |  | 482,2                              | -1205,79523                                   |
| D- <b>2b</b> | Boc-D-Leu-NH-Fn-COOMe |  | 478,3                              | -957,2157                                     |

|      |                       |                                                                                     |       |            |
|------|-----------------------|-------------------------------------------------------------------------------------|-------|------------|
| D-3b | Boc-D-Phe-NH-Fn-COOMe | 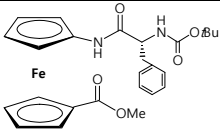   | 479,9 | -676,39962 |
| L-1a | Ac-L-Val-NH-Fn-COOMe  |    | 480,2 | 675,26792  |
| L-2a | Ac-L-Leu-NH-Fn-COOMe  |    | 474,2 | 455,83704  |
| L-3a | Ac-L-Phe-NH-Fn-COOMe  |    | 478,3 | 672,45099  |
| D-1a | Ac-D-Val-NH-Fn-COOMe  |    | 483,9 | -687,37927 |
| D-2a | Ac-D-Leu-NH-Fn-COOMe  |   | 475,1 | -479,18576 |
| D-3a | Ac-D-Phe-NH-Fn-COOMe  |  | 476,6 | -643,06888 |

**Table S6.** Relative energies (reported energies refer to standard Gibbs free energies at 298 K in kJ mol<sup>-1</sup>) of the most stable conformers of D-series of compounds **1a–3a** (Ac-protected) and **1b–3b** (Boc-protected), AA=Val, Leu, Phe. Optimizations were performed at the B3LYP-D3/6-311+G(d,p), LanL2DZ for Fe, level of theory, SMD model for solvent effects. Stereochemical descriptors and helicity determined from the value of pseudo-torsion angles, X–Y distances (in Å) of the selected X–H...Y hydrogen bonds connecting the *n*-membered rings.

| type        | Stereochemical descriptors | $\Delta E$ / kJ mol <sup>-1</sup> | $\omega$ / °<br>pseudotorsion angle | NH <sub>Fca</sub> ...O=C <sub>Ac/Boc</sub><br>7-membered | NH <sub>Fca</sub> ...N <sub>AA</sub><br>5-membered | NH <sub>AA</sub> ...O=C <sub>COOMe</sub><br>9-membered |
|-------------|----------------------------|-----------------------------------|-------------------------------------|----------------------------------------------------------|----------------------------------------------------|--------------------------------------------------------|
| <b>1a-1</b> | <i>P</i> -1,2'             | 0.00                              | +39.9                               | 2.99                                                     | -                                                  | 2.95                                                   |
| <b>1a-2</b> | <i>P</i> -1,2'             | 1.73                              | +43.4                               | 3.00                                                     | -                                                  | 2.99                                                   |
| <b>1a-3</b> | <i>M</i> -1,1'             | 1.95                              | -32.1                               | 2.83                                                     | -                                                  | 2.96                                                   |
| <b>1a-4</b> | <i>P</i> -1,1'             | 2.61                              | +17.4                               | 2.93                                                     | -                                                  | -                                                      |
| <b>1a-5</b> | <i>P</i> -1,1'             | 5.19                              | +17.0                               | 2.92                                                     | -                                                  | -                                                      |
| <b>1b-1</b> | <i>M</i> -1,1'             | 0.00                              | -30.4                               | -                                                        | 2.70                                               | 2.96                                                   |
| <b>1b-2</b> | <i>P</i> -1,2'             | 6.11                              | +41.7                               | 3.07                                                     | -                                                  | 2.92                                                   |
| <b>2a-1</b> | <i>P</i> -1,2'             | 0.00                              | +38.7                               | 2.96                                                     | -                                                  | 2.96                                                   |
| <b>2a-2</b> | <i>P</i> -1,2'             | 0.73                              | +39.1                               | 2.97                                                     | -                                                  | 2.94                                                   |
| <b>2a-3</b> | <i>P</i> -1,1'             | 3.41                              | +15.9                               | 2.92                                                     | -                                                  | -                                                      |
| <b>2b-1</b> | <i>M</i> -1,1'             | 0.00                              | -29.3                               | -                                                        | 2.69                                               | 2.93                                                   |
| <b>2b-2</b> | <i>P</i> -1,1'             | 3.87                              | +31.6                               | -                                                        | 2.71                                               | 2.97                                                   |
| <b>2b-3</b> | <i>M</i> -1,1'             | 4.22                              | -28.6                               | -                                                        | 2.69                                               | 2.94                                                   |
| <b>3a-1</b> | <i>P</i> -1,2'             | 0.00                              | +40.2                               | 2.98                                                     | -                                                  | 2.93                                                   |
| <b>3a-2</b> | <i>M</i> -1,5'             | 1.71                              | -50.7                               | -                                                        | 2.70                                               | 2.96                                                   |
| <b>3a-3</b> | <i>P</i> -1,1'             | 4.91                              | +17.9                               | -                                                        | -                                                  | 3.03                                                   |
| <b>3b-1</b> | <i>M</i> -1,1'             | 0.00                              | -32.0                               | -                                                        | 2.70                                               | 2.93                                                   |
| <b>3b-2</b> | <i>M</i> -1,1'             | 1.29                              | -28.1                               | -                                                        | 2.69                                               | 2.93                                                   |
| <b>3b-3</b> | <i>P</i> -1,1'             | 2.30                              | +31.8                               | -                                                        | 2.70                                               | 2.97                                                   |

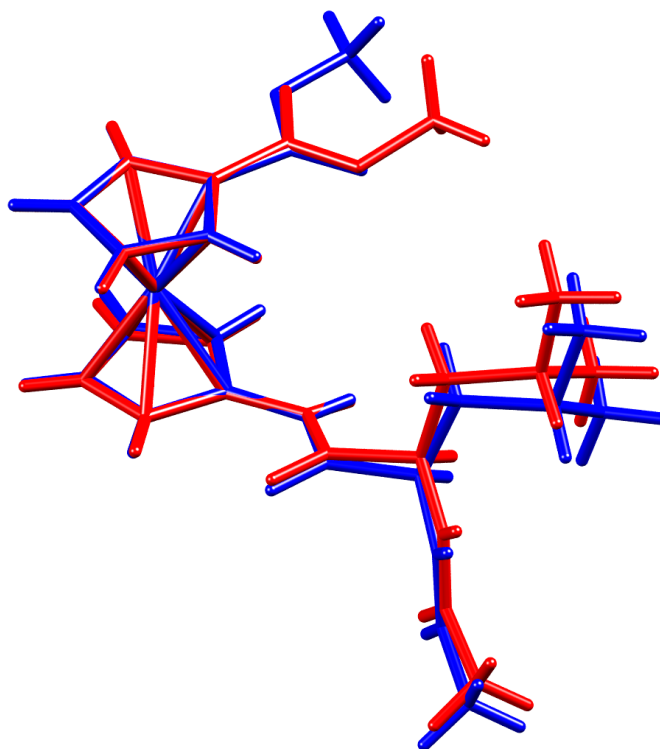

**Figure S13.** Overlay of two symmetry-independent molecules in crystal structure of D-**2a**: A is red and B is blue.

**Table S7.** Geometric parameters of hydrogen bonding (Å, °).

|               | <i>D</i> –H / Å | H... <i>A</i> / Å | <i>D</i> ... <i>A</i> / Å | <i>D</i> –H... <i>A</i> / ° | Symm. op. on <i>A</i>                        |
|---------------|-----------------|-------------------|---------------------------|-----------------------------|----------------------------------------------|
| N1–H1...O5    | 0.86            | 2.02              | 2.876(4)                  | 171                         | 1– <i>x</i> , –1/2+ <i>y</i> , 3/2– <i>z</i> |
| N2–H2A...O6   | 0.86            | 2.11              | 2.964(5)                  | 171                         | <i>x</i> , <i>y</i> , <i>z</i>               |
| N3–H3A...O1   | 0.86            | 2.03              | 2.881(5)                  | 169                         | <i>x</i> , <i>y</i> , <i>z</i>               |
| N4–H4A...O2   | 0.86            | 2.06              | 2.912(5)                  | 170                         | 1– <i>x</i> , 1/2+ <i>y</i> , 3/2– <i>z</i>  |
| C5–H5...O1    | 0.93            | 2.49              | 2.921(5)                  | 109                         | <i>x</i> , <i>y</i> , <i>z</i>               |
| C14–H14C...O8 | 0.96            | 2.70              | 3.351(7)                  | 125                         | 1/2– <i>x</i> , 1– <i>y</i> , 1/2+ <i>z</i>  |
| C25–H25...O5  | 0.93            | 2.53              | 2.964(7)                  | 108                         | <i>x</i> , <i>y</i> , <i>z</i>               |
| C32–H32...O1  | 0.98            | 2.70              | 3.475(7)                  | 136                         | <i>x</i> , <i>y</i> , <i>z</i>               |

**Table S8.** Crystallographic, data collection and refinement data.

| D-2a                                                          |                                                                     |
|---------------------------------------------------------------|---------------------------------------------------------------------|
| Empirical formula                                             | C <sub>20</sub> H <sub>26</sub> FeN <sub>2</sub> O <sub>4</sub>     |
| Formula wt. / g mol <sup>-1</sup>                             | 414.28                                                              |
| Colour                                                        | yellow                                                              |
| Crystal dimensions / mm                                       | 0.10 x 0.03 x 0.02                                                  |
| Space group                                                   | <i>P</i> 2 <sub>1</sub> 2 <sub>1</sub> 2 <sub>1</sub>               |
| <i>a</i> / Å                                                  | 12.1234(2)                                                          |
| <i>b</i> / Å                                                  | 16.8527(3)                                                          |
| <i>c</i> / Å                                                  | 21.1094(4)                                                          |
| $\alpha$ / °                                                  | 90                                                                  |
| $\beta$ / °                                                   | 90                                                                  |
| $\gamma$ / °                                                  | 90                                                                  |
| <i>Z</i>                                                      | 8                                                                   |
| <i>V</i> / Å <sup>3</sup>                                     | 4312.90(13)                                                         |
| <i>D</i> <sub>calc</sub> / g cm <sup>-3</sup>                 | 1.276                                                               |
| $\lambda$ / Å                                                 | 1.54184                                                             |
| $\mu$ / mm <sup>-1</sup>                                      | 5.820                                                               |
| $\Theta$ range / °                                            | 3.36 - 79.86                                                        |
| <i>T</i> / K                                                  | 296(2)                                                              |
| Diffraction type                                              | Synergy S                                                           |
| Range of <i>h, k, l</i>                                       | -15 < <i>h</i> < 15;<br>-21 < <i>k</i> < 19;<br>-26 < <i>l</i> < 25 |
| Reflections collected                                         | 41552                                                               |
| Independent reflections                                       | 9214                                                                |
| Observed reflections<br>( <i>I</i> ≥ 2σ)                      | 6983                                                                |
| Absorption correction                                         | multi-scan                                                          |
| <i>T</i> <sub>min</sub> , <i>T</i> <sub>max</sub>             | 0.2708; 1.0000                                                      |
| <i>R</i> <sub>int</sub>                                       | 0.0679                                                              |
| <i>R</i> ( <i>F</i> )                                         | 0.0425                                                              |
| <i>R</i> <sub>w</sub> ( <i>F</i> <sup>2</sup> )               | 0.1278                                                              |
| Goodness of fit                                               | 1.032                                                               |
| H atom treatment                                              | riding                                                              |
| No. of parameters                                             | 488                                                                 |
| No. of restraints                                             | 0                                                                   |
| $\Delta\rho_{\max}$ , $\Delta\rho_{\min}$ (eÅ <sup>-3</sup> ) | 0.467; -0.294                                                       |

L-1b

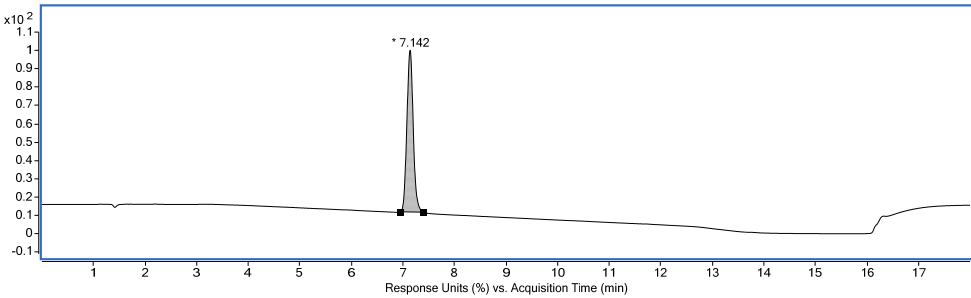

L-2b

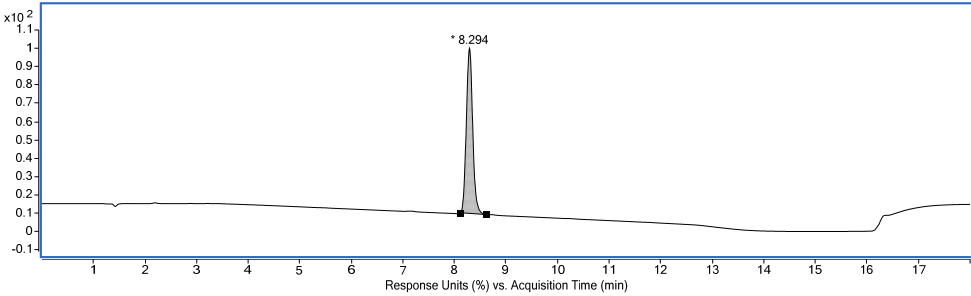

L-3b

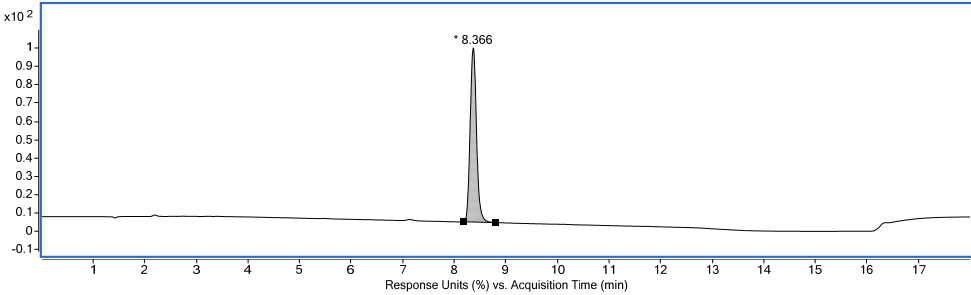

D-1b

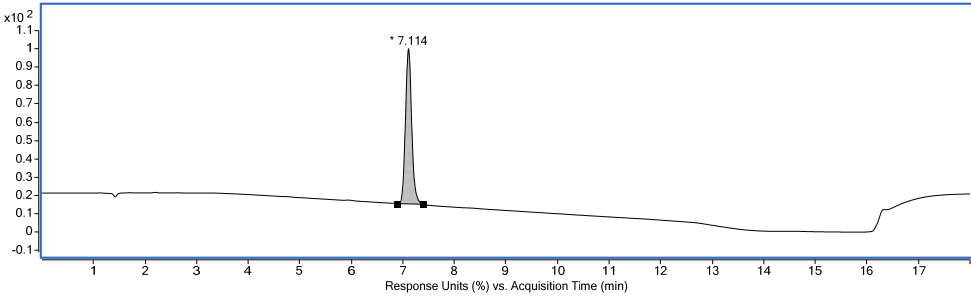

D-2b

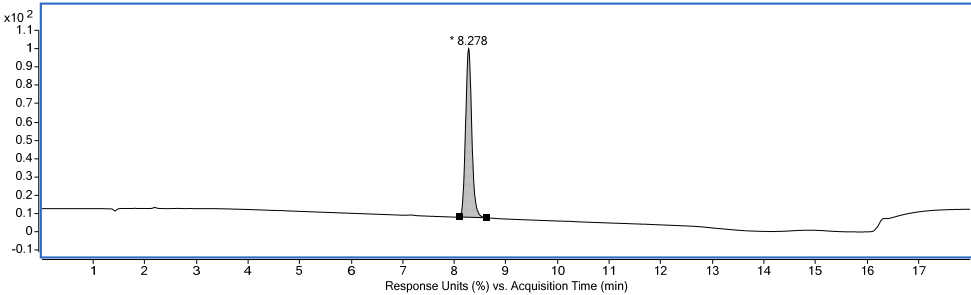

D-3b

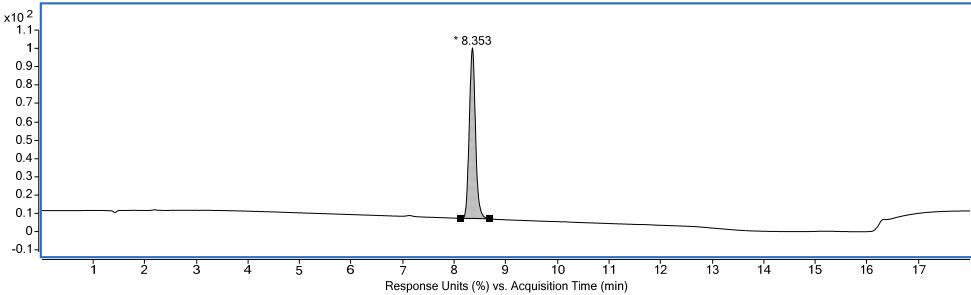

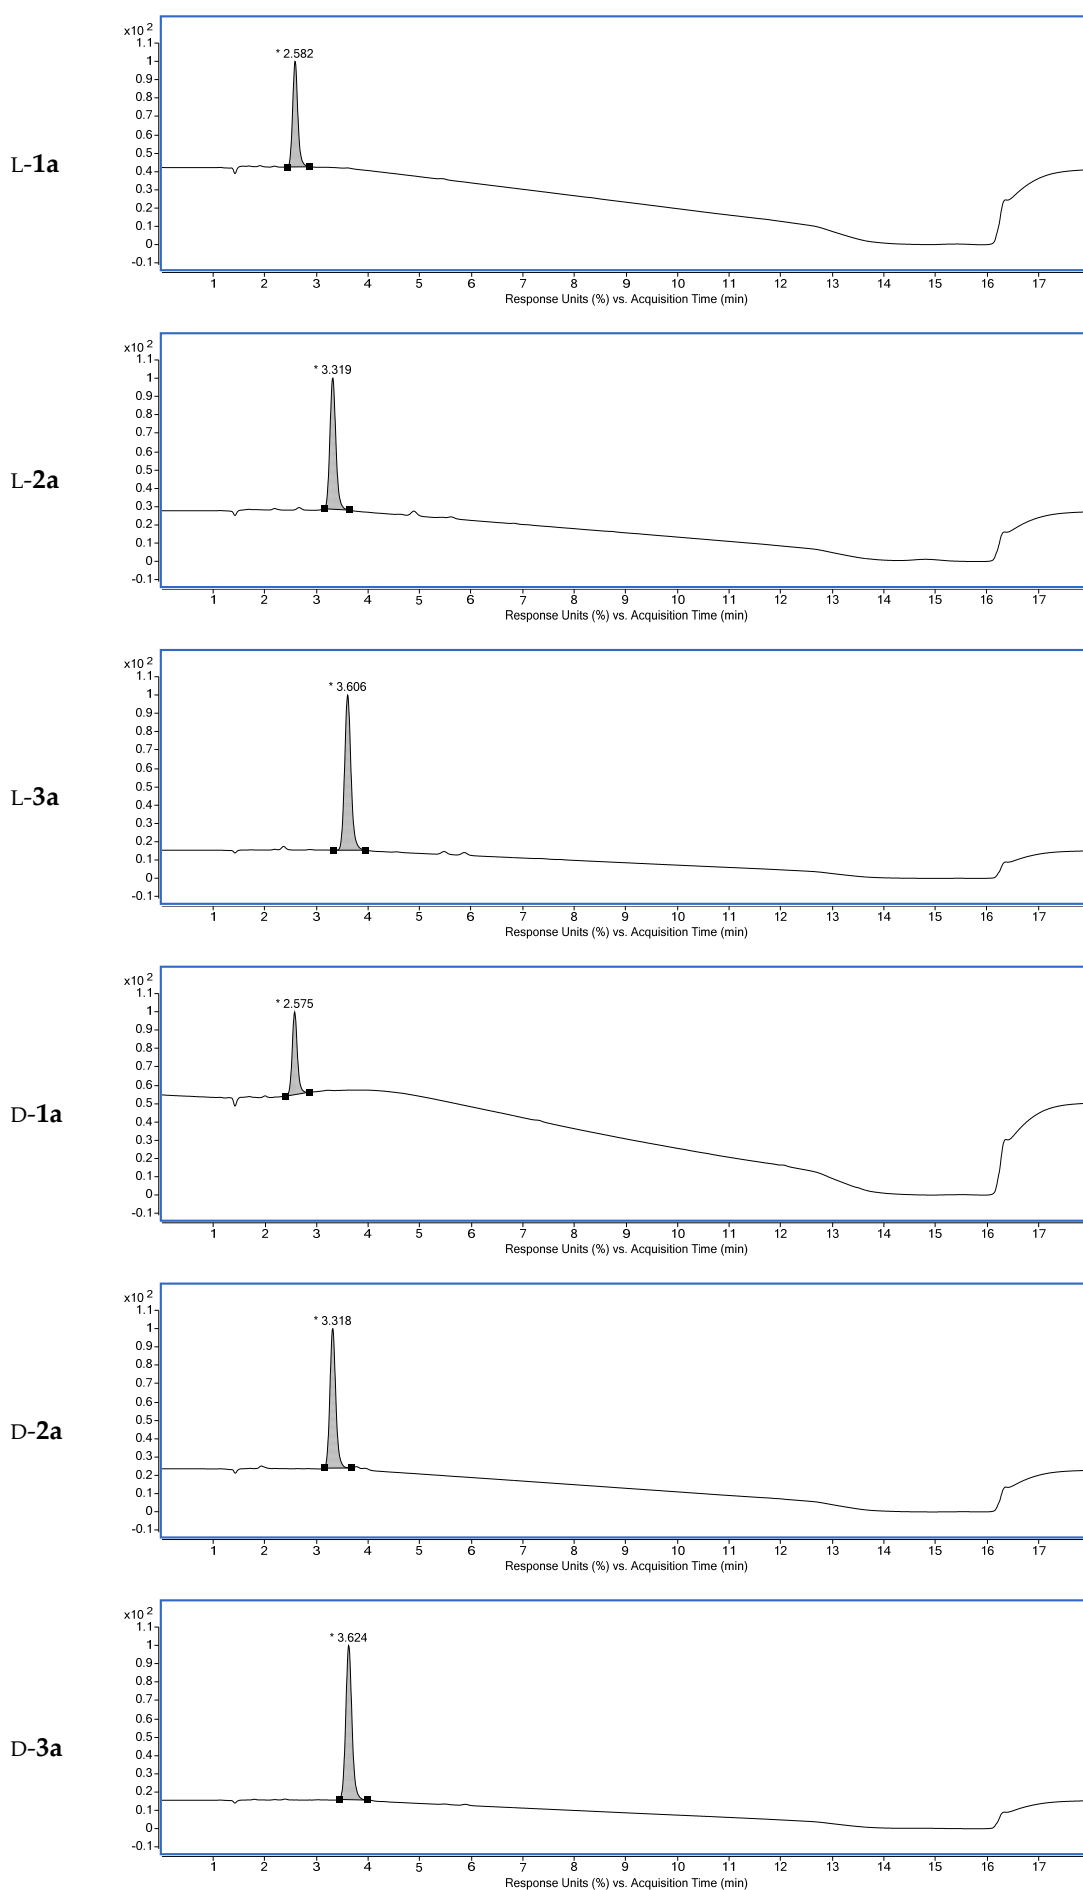

**Figure S14.** HPLC chromatograms of L-/D-1a-3a and L-/D-1b-3b
